# Supplementary material for: Disease burden and risk factors of children aged 0–14 years in China: a retrospective study on data from the Global Burden of Disease Study 2019
Source: HighWire-hosted journal article supplement (doi:10.1136/bmjopen-2023-076013), 2024-05-01
Supplement: bmjopen-2023-076013supp001_data_supplement.pdf [file bmjopen-2023-076013supp001_data_supplement.pdf]

## Disease burden and risk factors of children aged 0-14 years in China: a retrospective study on data from the Global Burden of Disease Study 2019

### 1 Supplementary table 1 Ranking of constituent ratio of deaths for children aged < 5 years from 1990 to 2019

| 1990 rank                                       |                        | 2019 rank                                      |                        |
|-------------------------------------------------|------------------------|------------------------------------------------|------------------------|
| Disease/Injury and rank                         | Death,% (95%UI)        | Disease/Injury and rank                        | Death,% (95%UI)        |
| 1 Respiratory infections and tuberculosis       | 31.12 (27.36 to 34.13) | 1 Neonatal disorders                           | 34.39 (32.22 to 35.87) |
| 2 Neonatal disorders                            | 21.47 (20.66 to 22.17) | 2 Congenital birth defects                     | 23.67 (21.31 to 27.87) |
| 3 Congenital birth defects                      | 12.29 (9.83 to 16.91)  | 3 Unintentional injuries                       | 12.27 (10.69 to 13.12) |
| 4 Unintentional injuries                        | 9.62 (8.59 to 10.46)   | 4 Respiratory infections and tuberculosis      | 11.66 (10.26 to 12.83) |
| 5 Other infectious diseases                     | 8.37 (5.78 to 12.65)   | 5 Neoplasms                                    | 3.76 (3.22 to 4.55)    |
| 6 Enteric infections                            | 5.78 (4.91 to 6.67)    | 6 Other infectious diseases                    | 3.57 (2.89 to 4.63)    |
| 7 Nutritional deficiencies                      | 2.19 (1.86 to 2.56)    | 7 Transport injuries                           | 3.18 (2.69 to 3.52)    |
| 8 Transport injuries                            | 1.94 (1.60 to 2.48)    | 8 HIV/AIDS and sexually transmitted infections | 1.81 (0.85 to 3.43)    |
| 9 Neoplasms                                     | 1.88 (1.43 to 2.31)    | 9 Digestive diseases                           | 1.31 (1.08 to 1.62)    |
| 10 Digestive diseases                           | 1.33 (1.09 to 1.57)    | 10 Cardiovascular diseases                     | 1.23 (1.10 to 1.42)    |
| 11 Cardiovascular diseases                      | 1.31 (1.13 to 1.47)    | 11 Enteric infections                          | 1.21 (0.97 to 1.47)    |
| 12 Self-harm and interpersonal violence         | 0.47 (0.40 to 0.55)    | 12 Neurological disorders                      | 0.61 (0.53 to 0.73)    |
| 13 Neurological disorders                       | 0.38 (0.30 to 0.46)    | 13 Nutritional deficiencies                    | 0.48 (0.40 to 0.55)    |
| 14 HIV/AIDS and sexually transmitted infections | 0.35 (0.13 to 0.73)    | 14 Self-harm and interpersonal violence        | 0.40 (0.33 to 0.47)    |
| 15 Diabetes and kidney diseases                 | 0.26 (0.23 to 0.29)    | 15 Diabetes and kidney diseases                | 0.24 (0.21 to 0.27)    |
| 16 Chronic respiratory diseases                 | 0.15 (0.10 to 0.18)    | 16 Chronic respiratory diseases                | 0.09 (0.07 to 0.11)    |
| 17 Neglected tropical diseases and malaria      | 0.10 (0.05 to 0.30)    | 17 Neglected tropical diseases and malaria     | 0.06 (0.03 to 0.08)    |
| 18 Skin and subcutaneous diseases               | 0.08 (0.04 to 0.10)    | 18 Skin and subcutaneous diseases              | 0.05 (0.04 to 0.07)    |
| 19 Substance use disorders                      | 0.00 (0.00 to 0.00)    | 19 Substance use disorders                     | 0.00 (0.00 to 0.00)    |

## 2 Supplementary table 2 Ranking of constituent ratio of DALYs for children aged < 5 years from 1990 to 2019.

| 1990 rank                                       |                        | 2019 rank                                       |                        |
|-------------------------------------------------|------------------------|-------------------------------------------------|------------------------|
| Disease/Injury and rank                         | DALYs,% (95%UI)        | Disease/Injury and rank                         | DALYs,% (95%UI)        |
| 1 Respiratory infections and tuberculosis       | 30.44 (26.76 to 33.40) | 1 Neonatal disorders                            | 31.91 (29.51 to 33.71) |
| 2 Neonatal disorders                            | 21.24 (20.40 to 21.98) | 2 Congenital birth defects                      | 22.95 (20.84 to 26.51) |
| 3 Congenital birth defects                      | 12.21 (9.81 to 16.73)  | 3 Respiratory infections and tuberculosis       | 10.87 (9.66 to 11.92)  |
| 4 Unintentional injuries                        | 9.28 (8.26 to 10.08)   | 4 Unintentional injuries                        | 10.58 (9.22 to 11.50)  |
| 5 Other infectious diseases                     | 8.17 (5.65 to 12.33)   | 5 Neoplasms                                     | 3.29 (2.81 to 4.00)    |
| 6 Enteric infections                            | 5.81 (4.96 to 6.67)    | 6 Other infectious diseases                     | 3.17 (2.57 to 3.99)    |
| 7 Nutritional deficiencies                      | 2.66 (2.29 to 3.06)    | 7 Skin and subcutaneous diseases                | 3.05 (1.98 to 4.49)    |
| 8 Transport injuries                            | 1.86 (1.54 to 2.39)    | 8 Transport injuries                            | 2.70 (2.29 to 3.03)    |
| 9 Neoplasms                                     | 1.84 (1.40 to 2.26)    | 9 Enteric infections                            | 2.08 (1.64 to 2.58)    |
| 10 Digestive diseases                           | 1.36 (1.13 to 1.59)    | 10 Digestive diseases                           | 1.63 (1.36 to 1.95)    |
| 11 Cardiovascular diseases                      | 1.28 (1.10 to 1.43)    | 11 HIV/AIDS and sexually transmitted infections | 1.56 (0.73 to 2.98)    |
| 12 Skin and subcutaneous diseases               | 0.54 (0.36 to 0.78)    | 12 Nutritional deficiencies                     | 1.36 (1.02 to 1.82)    |
| 13 Neurological disorders                       | 0.46 (0.37 to 0.55)    | 13 Cardiovascular diseases                      | 1.11 (0.99 to 1.28)    |
| 14 Self-harm and interpersonal violence         | 0.46 (0.39 to 0.54)    | 14 Neurological disorders                       | 1.03 (0.78 to 1.37)    |
| 15 HIV/AIDS and sexually transmitted infections | 0.35 (0.13 to 0.72)    | 15 Chronic respiratory diseases                 | 0.75 (0.42 to 1.27)    |
| 16 Diabetes and kidney diseases                 | 0.26 (0.23 to 0.29)    | 16 Mental disorders                             | 0.65 (0.44 to 0.90)    |
| 17 Chronic respiratory diseases                 | 0.25 (0.18 to 0.34)    | 17 Sense organ diseases                         | 0.56 (0.37 to 0.79)    |
| 18 Neglected tropical diseases and malaria      | 0.18 (0.12 to 0.38)    | 18 Self-harm and interpersonal violence         | 0.36 (0.29 to 0.41)    |

---

|                              |                     |                                            |                     |
|------------------------------|---------------------|--------------------------------------------|---------------------|
| 19 Mental disorders          | 0.11 (0.07 to 0.16) | 19 Diabetes and kidney diseases            | 0.24 (0.21 to 0.28) |
| 20 Sense organ diseases      | 0.09 (0.06 to 0.13) | 20 Neglected tropical diseases and malaria | 0.16 (0.12 to 0.22) |
| 21 Substance use disorders   | 0.00 (0.00 to 0.00) | 21 Substance use disorders                 | 0.00 (0.00 to 0.00) |
| 22 Musculoskeletal disorders | 0.00 (0.00 to 0.00) | 22 Musculoskeletal disorders               | 0.00 (0.00 to 0.00) |

---

Notes: DALYs, disability-adjusted life-years; UI, Uncertainty intervals

### 3 Supplementary table 3 Ranking of constituent ratio of deaths for children aged 5-14 years from 1990 to 2019

| 1990 rank                                       |                        | 2019 rank                                       |                        |
|-------------------------------------------------|------------------------|-------------------------------------------------|------------------------|
| Disease/Injury and rank                         | Death,% (95%UI)        | Disease/Injury and rank                         | Death,% (95%UI)        |
| 1 Unintentional injuries                        | 36.11 (34.02 to 38.31) | 1 Unintentional injuries                        | 35.68 (33.23 to 37.03) |
| 2 Transport injuries                            | 12.91 (11.79 to 16.34) | 2 Neoplasms                                     | 18.47 (16.84 to 20.18) |
| 3 Neoplasms                                     | 11.33 (9.52 to 12.30)  | 3 Transport injuries                            | 17.06 (15.52 to 18.42) |
| 4 Respiratory infections and tuberculosis       | 8.87 (6.43 to 9.58)    | 4 Congenital birth defects                      | 6.91 (6.29 to 8.31)    |
| 5 Other infectious diseases                     | 7.31 (5.25 to 10.53)   | 5 Respiratory infections and tuberculosis       | 3.49 (3.16 to 4.16)    |
| 6 Congenital birth defects                      | 5.19 (4.48 to 5.78)    | 6 Self-harm and interpersonal violence          | 3.42 (3.13 to 3.72)    |
| 7 Self-harm and interpersonal violence          | 4.71 (3.92 to 5.09)    | 7 Cardiovascular diseases                       | 3.08 (2.88 to 3.45)    |
| 8 Cardiovascular diseases                       | 3.05 (2.76 to 3.36)    | 8 Other infectious diseases                     | 2.70 (2.36 to 3.23)    |
| 9 Enteric infections                            | 2.09 (1.23 to 3.02)    | 9 Neurological disorders                        | 2.17 (1.99 to 2.53)    |
| 10 Digestive diseases                           | 1.85 (1.69 to 2.00)    | 10 Diabetes and kidney diseases                 | 1.18 (1.11 to 1.27)    |
| 11 Neurological disorders                       | 1.56 (1.34 to 1.70)    | 11 Digestive diseases                           | 1.08 (0.96 to 1.22)    |
| 12 Diabetes and kidney diseases                 | 1.40 (1.28 to 1.52)    | 12 Enteric infections                           | 1.06 (0.69 to 1.65)    |
| 13 Chronic respiratory diseases                 | 0.89 (0.64 to 0.99)    | 13 HIV/AIDS and sexually transmitted infections | 0.57 (0.44 to 0.68)    |
| 14 Nutritional deficiencies                     | 0.49 (0.43 to 0.54)    | 14 Chronic respiratory diseases                 | 0.44 (0.40 to 0.51)    |
| 15 Neglected tropical diseases and malaria      | 0.45 (0.27 to 1.93)    | 15 Musculoskeletal disorders                    | 0.39 (0.33 to 0.50)    |
| 16 Musculoskeletal disorders                    | 0.19 (0.17 to 0.25)    | 16 Neglected tropical diseases and malaria      | 0.23 (0.13 to 0.29)    |
| 17 Skin and subcutaneous diseases               | 0.10 (0.05 to 0.12)    | 17 Nutritional deficiencies                     | 0.19 (0.17 to 0.21)    |
| 18 HIV/AIDS and sexually transmitted infections | 0.04 (0.02 to 0.06)    | 18 Skin and subcutaneous diseases               | 0.06 (0.05 to 0.08)    |
| 19 Mental disorders                             | 0.00 (0.00 to 0.00)    | 20 Mental disorders                             | 0.00 (0.00 to 0.01)    |
| 20 Neonatal disorders                           | 0.00 (0.00 to 0.00)    | 19 Neonatal disorders                           | 0.00 (0.00 to 0.00)    |
| 21 Substance use disorders                      | 0.00 (0.00 to 0.00)    | 21 Substance use disorders                      | 0.00 (0.00 to 0.00)    |

#### 4 Supplementary table 4 Ranking of constituent ratio of DALYs for children aged 5-14 years from 1990 to 2019

| 1990 rank                                  |                        | 2019 rank                                 |                        |
|--------------------------------------------|------------------------|-------------------------------------------|------------------------|
| Disease/Injury and rank                    | DALYs,% (95%UI)        | Disease/Injury and rank                   | DALYs,% (95%UI)        |
| 1 Unintentional injuries                   | 23.15 (20.38 to 26.31) | 1 Mental disorders                        | 14.29 (11.11 to 17.83) |
| 2 Transport injuries                       | 8.12 (6.88 to 10.39)   | 2 Unintentional injuries                  | 13.92 (11.55 to 16.76) |
| 3 Mental disorders                         | 7.69 (5.70 to 10.07)   | 3 Skin and subcutaneous diseases          | 13.09 (9.75 to 17.14)  |
| 4 Respiratory infections and tuberculosis  | 7.13 (5.65 to 7.80)    | 4 Neoplasms                               | 6.81 (5.41 to 8.41)    |
| 5 Neoplasms                                | 7.06 (5.76 to 8.09)    | 5 Transport injuries                      | 6.42 (5.16 to 7.90)    |
| 6 Skin and subcutaneous diseases           | 6.93 (4.99 to 9.35)    | 6 Neurological disorders                  | 5.95 (2.70 to 10.24)   |
| 7 Other infectious diseases                | 5.07 (3.80 to 7.07)    | 7 Neonatal disorders                      | 4.94 (3.72 to 6.29)    |
| 8 Congenital birth defects                 | 4.40 (3.84 to 5.01)    | 8 Congenital birth defects                | 4.28 (3.68 to 4.97)    |
| 9 Neurological disorders                   | 3.57 (1.86 to 5.84)    | 9 Respiratory infections and tuberculosis | 3.71 (3.00 to 4.61)    |
| 10 Nutritional deficiencies                | 3.56 (2.62 to 4.66)    | 10 Chronic respiratory diseases           | 3.61 (2.48 to 5.30)    |
| 11 Self-harm and interpersonal violence    | 3.10 (2.53 to 3.56)    | 11 Musculoskeletal disorders              | 3.59 (2.51 to 5.05)    |
| 12 Chronic respiratory diseases            | 2.43 (1.78 to 3.43)    | 12 Sense organ diseases                   | 3.53 (2.61 to 4.62)    |
| 13 Cardiovascular diseases                 | 2.35 (2.09 to 2.64)    | 13 Nutritional deficiencies               | 2.09 (1.53 to 2.84)    |
| 14 Musculoskeletal disorders               | 2.04 (1.40 to 2.95)    | 14 Cardiovascular diseases                | 1.93 (1.66 to 2.23)    |
| 15 Enteric infections                      | 2.00 (1.44 to 2.61)    | 15 Enteric infections                     | 1.91 (1.41 to 2.57)    |
| 16 Sense organ diseases                    | 1.96 (1.34 to 2.74)    | 16 Self-harm and interpersonal violence   | 1.61 (1.27 to 1.99)    |
| 17 Neglected tropical diseases and malaria | 1.83 (1.23 to 2.91)    | 17 Other infectious diseases              | 1.40 (1.20 to 1.66)    |
| 18 Digestive diseases                      | 1.78 (1.56 to 2.03)    | 18 Digestive diseases                     | 1.16 (0.94 to 1.45)    |

---

|                                                 |                     |                                                 |                     |
|-------------------------------------------------|---------------------|-------------------------------------------------|---------------------|
| 19 Neonatal disorders                           | 1.10 (0.83 to 1.42) | 19 Neglected tropical diseases and malaria      | 0.70 (0.48 to 0.95) |
| 20 Diabetes and kidney diseases                 | 0.98 (0.86 to 1.11) | 20 Diabetes and kidney diseases                 | 0.64 (0.52 to 0.81) |
| 21 Substance use disorders                      | 0.03 (0.02 to 0.05) | 21 HIV/AIDS and sexually transmitted infections | 0.22 (0.16 to 0.28) |
| 22 HIV/AIDS and sexually transmitted infections | 0.03 (0.02 to 0.04) | 22 Substance use disorders                      | 0.05 (0.03 to 0.07) |

---

Notes: DALYs, disability-adjusted life-years; UI, Uncertainty intervals

5 **Supplementary table 5 The main risk factors of deaths for children aged <5 years in 2019**

| Risk factors     | Deaths (number) | 95%UI    |          |
|------------------|-----------------|----------|----------|
|                  |                 | Lower    | Upper    |
| Low birth weight | 32015.14        | 27306.50 | 37050.59 |
| Short gestation  | 30142.08        | 25764.33 | 35011.36 |
| Child wasting    | 6407.02         | 3488.40  | 8788.80  |

Notes: UI, Uncertainty intervals

6 **Supplementary table 6 The main risk factors of DALYs for children aged <5 years in 2019**

| Risk factors                         | DALYs (number) | 95%UI      |            |
|--------------------------------------|----------------|------------|------------|
|                                      |                | Lower      | Upper      |
| Low birth weight                     | 2929169.42     | 2516687.62 | 3373041.83 |
| Short gestation                      | 2762744.73     | 2369528.31 | 3188025.98 |
| Child wasting                        | 563831.86      | 307254.84  | 773336.52  |
| Ambient particulate matter pollution | 387305.85      | 292355.58  | 487611.39  |

Notes: DALYs, disability-adjusted life-years; UI, Uncertainty intervals

7 **Supplementary table 7 The main risk factors of deaths for children aged 5-14 years in 2019**

| Risk factors                         | Deaths (number) | 95%UI  |        |
|--------------------------------------|-----------------|--------|--------|
|                                      |                 | Lower  | Upper  |
| Alcohol use                          | 686.23          | 405.01 | 970.66 |
| Kidney dysfunction                   | 282.73          | 249.40 | 320.09 |
| Secondhand smoke                     | 206.50          | 131.08 | 288.97 |
| Ambient particulate matter pollution | 205.55          | 137.76 | 289.43 |
| Low temperature                      | 139.16          | 84.38  | 197.42 |

|                  |        |       |        |
|------------------|--------|-------|--------|
| High temperature | 114.72 | 73.65 | 202.59 |
|------------------|--------|-------|--------|

Notes: UI, Uncertainty intervals

**8 Supplementary table 8 The main risk factors of DALYs for children aged 5-14 years in 2019**

| Risk factors           | DALYs (number) | 95%UI     |           |
|------------------------|----------------|-----------|-----------|
|                        |                | Lower     | Upper     |
| Short gestation        | 148033.90      | 113911.20 | 186253.10 |
| Low birth weight       | 148033.90      | 113911.20 | 186253.10 |
| Iron deficiency        | 88432.60       | 48730.73  | 146051.50 |
| Bullying victimization | 79723.42       | 31690.94  | 153956.10 |
| Unsafe water source    | 75267.48       | 37097.76  | 124351.30 |
| Alcohol use            | 57678.62       | 34345.31  | 81828.56  |
| Child underweight      | 46893.92       | 25913.21  | 78494.57  |
| Child wasting          | 46893.92       | 25913.21  | 78494.57  |
| Unsafe sanitation      | 42637.01       | 25132.96  | 67713.29  |

Notes: DALYs, disability-adjusted life-years; UI, Uncertainty intervals

**9 Supplementary table 9 Detailed disease/injuries and DALYs of other infectious diseases in children aged 5-14 years in 2019**

| Level | Disease/Injury                        | DALYs, number (95% UI)               |
|-------|---------------------------------------|--------------------------------------|
| 2     | Other infectious diseases             | 105,943.70 (89,172.32 to 126,794.91) |
| 3     | Encephalitis                          | 34,445.09 (28,420.34 to 44,949.25)   |
| 3     | Meningitis                            | 32,717.80 (28,100.39 to 37,888.96)   |
| 3     | Other unspecified infectious diseases | 13,031.04 (9,564.79 to 17,901.93)    |
| 3     | Acute hepatitis                       | 11,599.30 (7,567.06 to 16,808.03)    |
| 3     | Measles                               | 6,548.77 (2,101.37 to 15,254.94)     |



---

|   |                             |                                 |
|---|-----------------------------|---------------------------------|
| 3 | Whooping cough              | 3,378.64 (439.78 to 9,894.21)   |
| 3 | Varicella and herpes zoster | 2,849.03 (2,148.13 to 3,802.13) |
| 3 | Tetanus                     | 1,210.21 (997.42 to 1,597.90)   |
| 3 | Diphtheria                  | 163.82 (120.25 to 213.94)       |

---

Notes: DALYs, disability-adjusted life-years; UI, Uncertainty intervals

## 10 Supplementary figure 1

**IHME | GHDx**

Search

Explore results from the 2019 Global Burden of Disease (GBD) study. For more info, refer to the [About](#) section.

**GBD Estimate**  
Cause of death or injury

**Measure**  
Deaths x DALYs x

**Metric**  
Number x Percent x

**Cause**  
HIV/AIDS and sexually transmitted infections x  
Respiratory infections and tuberculosis x Enteric infections x  
Neglected tropical diseases and malaria x +18 more

**Location**  
China x

**Age**  
5-14 years x <5 years x

**Sex**  
Both x

**Annual rate of change**  
2019 x 1990 x

Search

Download Share

**IHME | GHDx**

Search

Explore results from the 2019 Global Burden of Disease (GBD) study. For more info, refer to the [About](#) section.

**GBD Estimate**  
Risk factor

**Measure**  
Deaths x DALYs x

**Metric**  
Number x Percent x

**Risk**  
Unsafe water source x Unsafe sanitation x  
No access to handwashing facility x Ambient particulate matter pollution x  
+65 more

**Cause**  
HIV/AIDS and sexually transmitted infections x  
Respiratory infections and tuberculosis x Enteric infections x  
Other infectious diseases x +16 more

**Location**  
China x

**Age**  
5-14 years x <5 years x

**Sex**  
Both x

**Annual rate of change**  
2019 x

Too many parameters selected to search.  
Select fewer options or use the **Download** button.

Search

Download Share

### 11 Supplementary figure 2

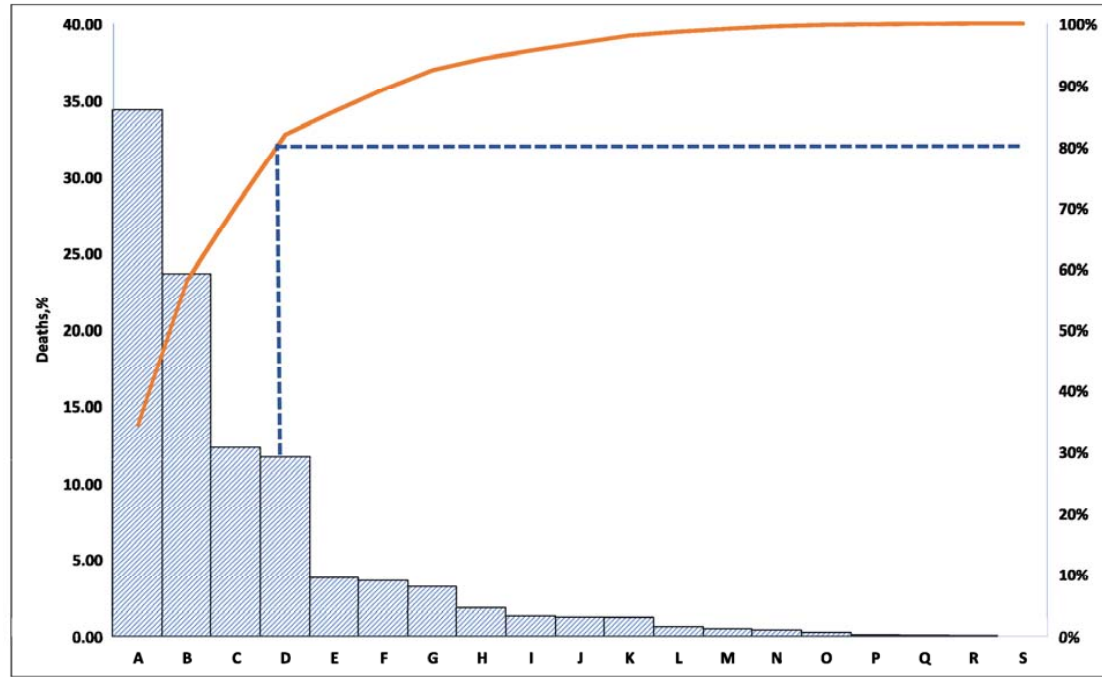

## 12 Supplementary figure 3

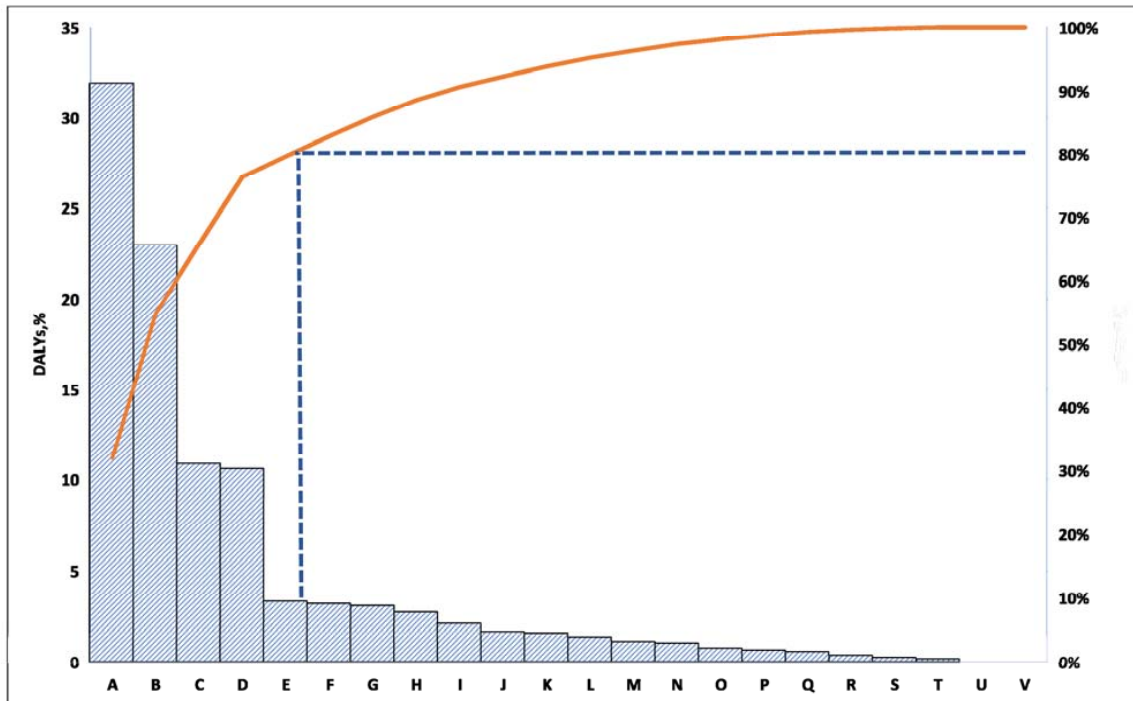

## 13 Supplementary figure 4

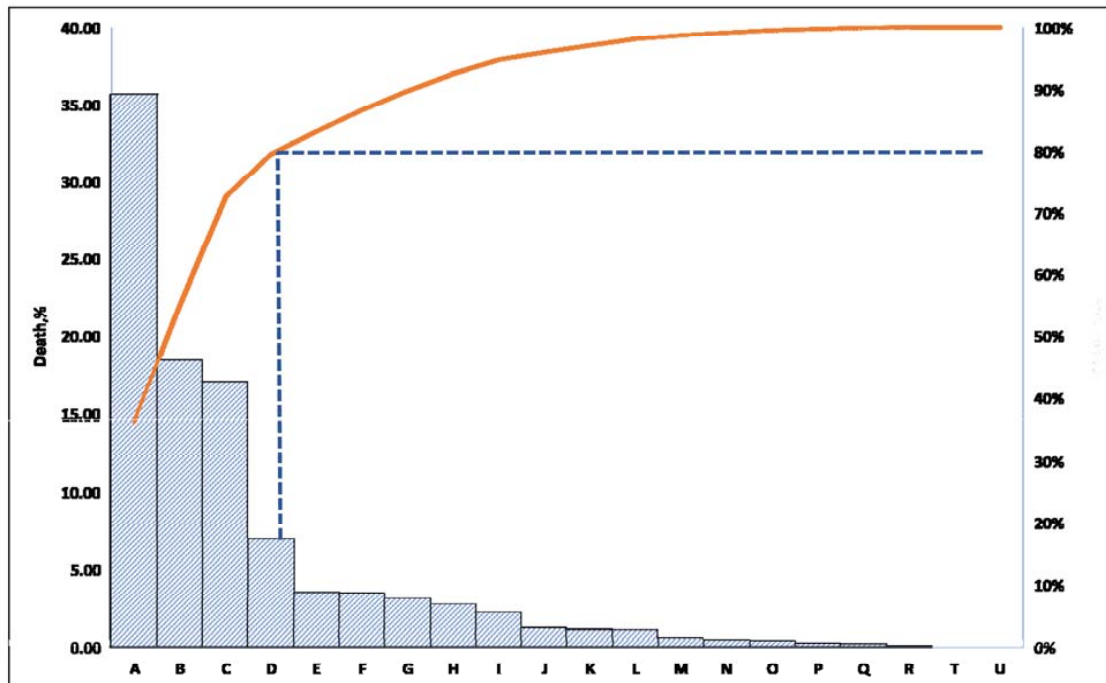

## 14 Supplementary figure 5

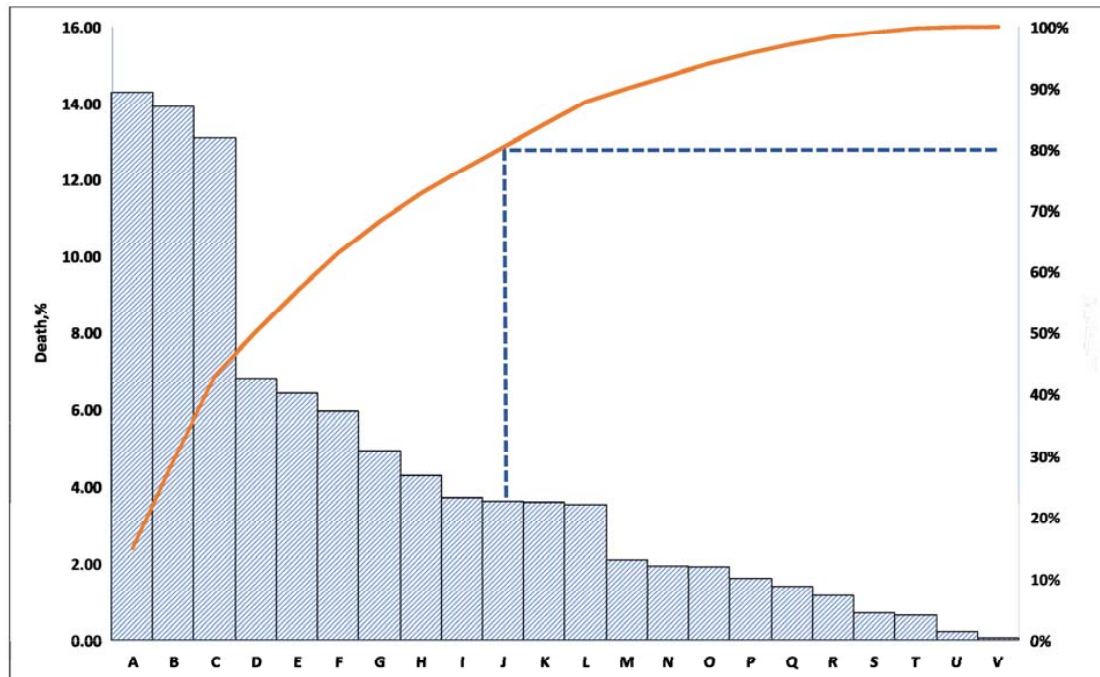

## 15 Supplementary figure 6

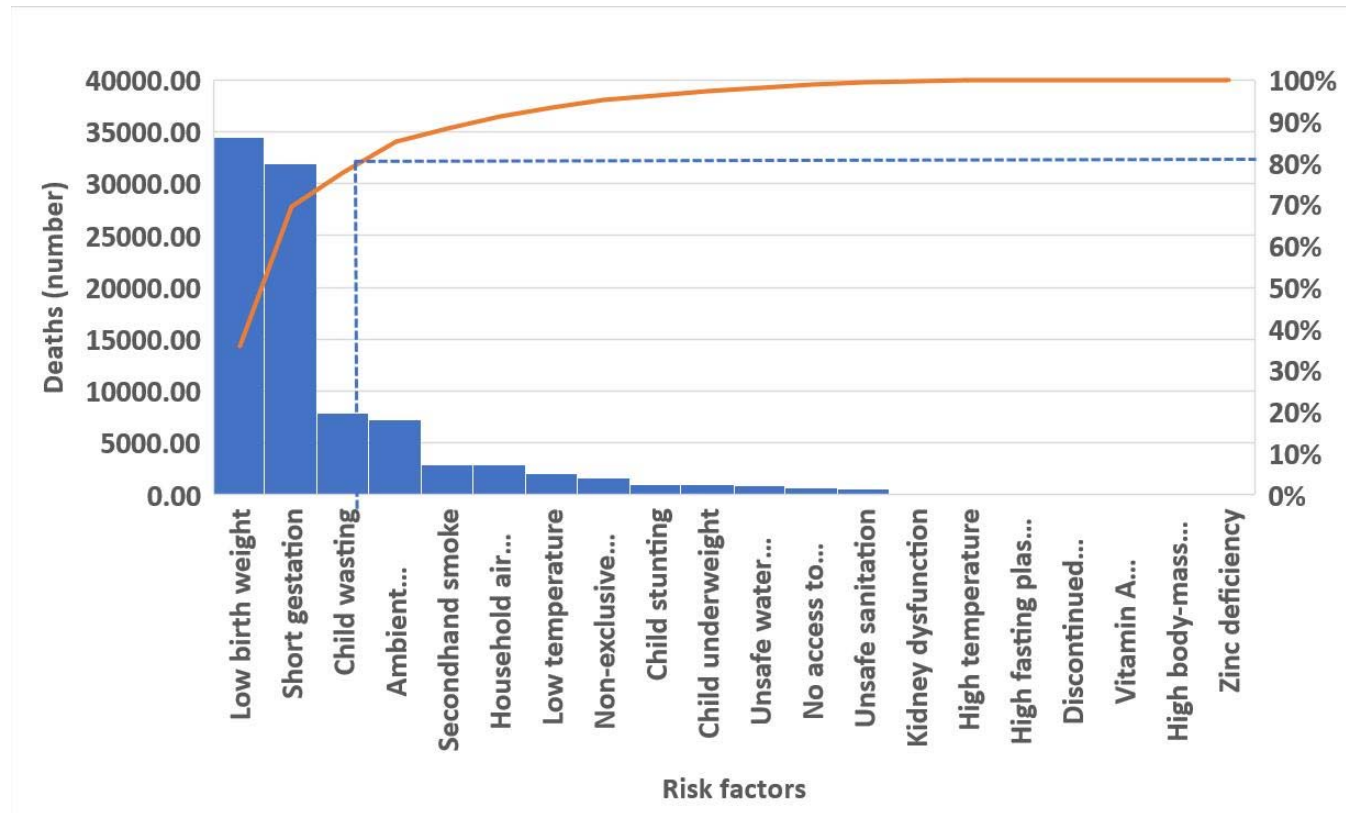

16 Supplementary figure 7

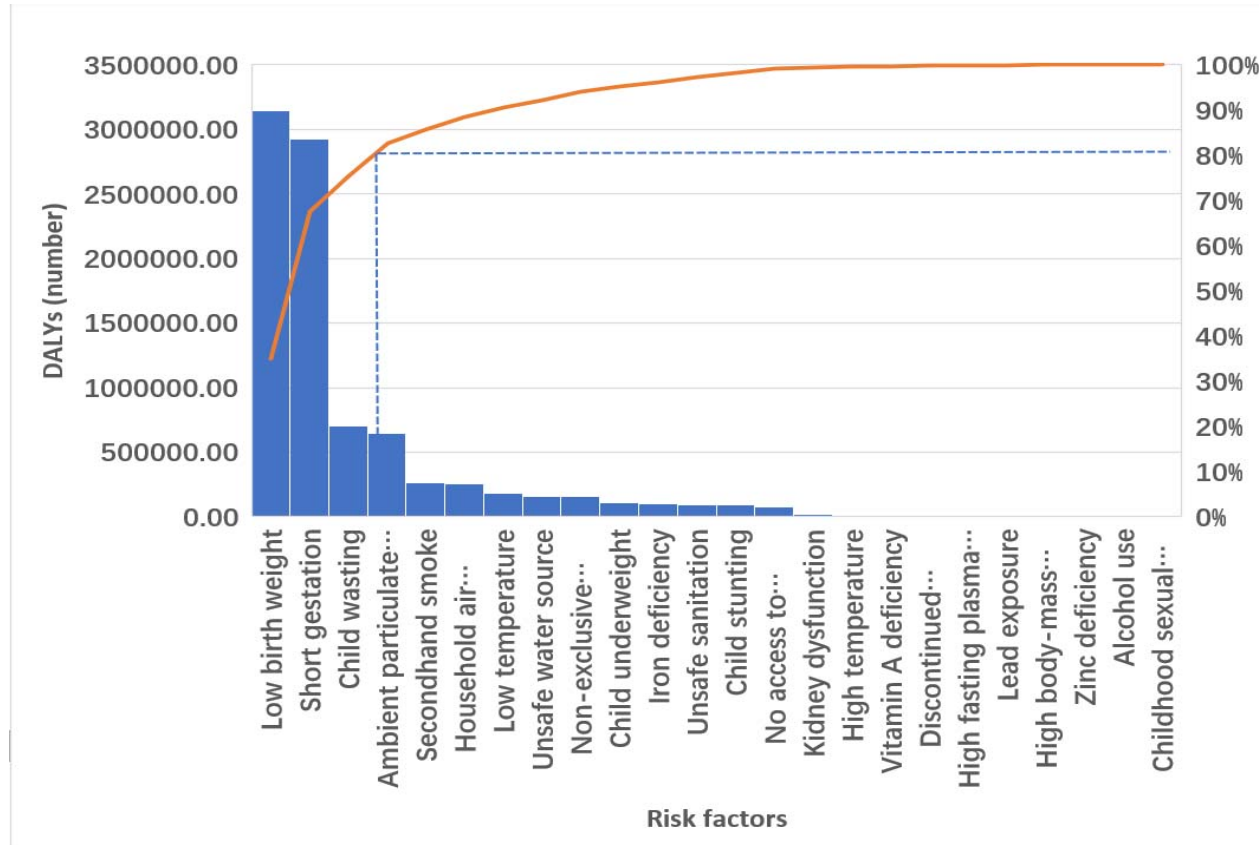



## 17 Supplementary figure 8

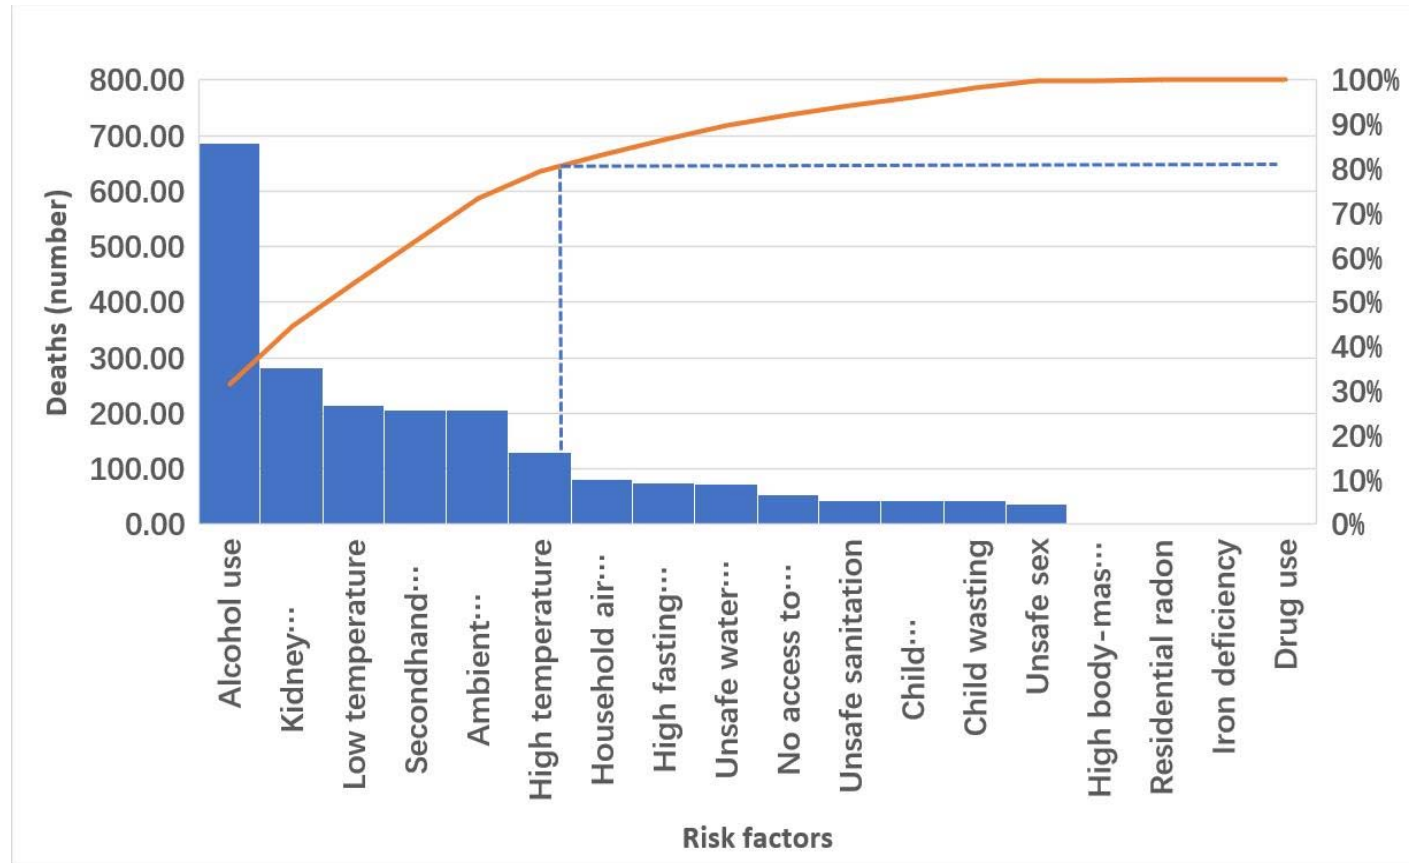

18 Supplementary figure 9

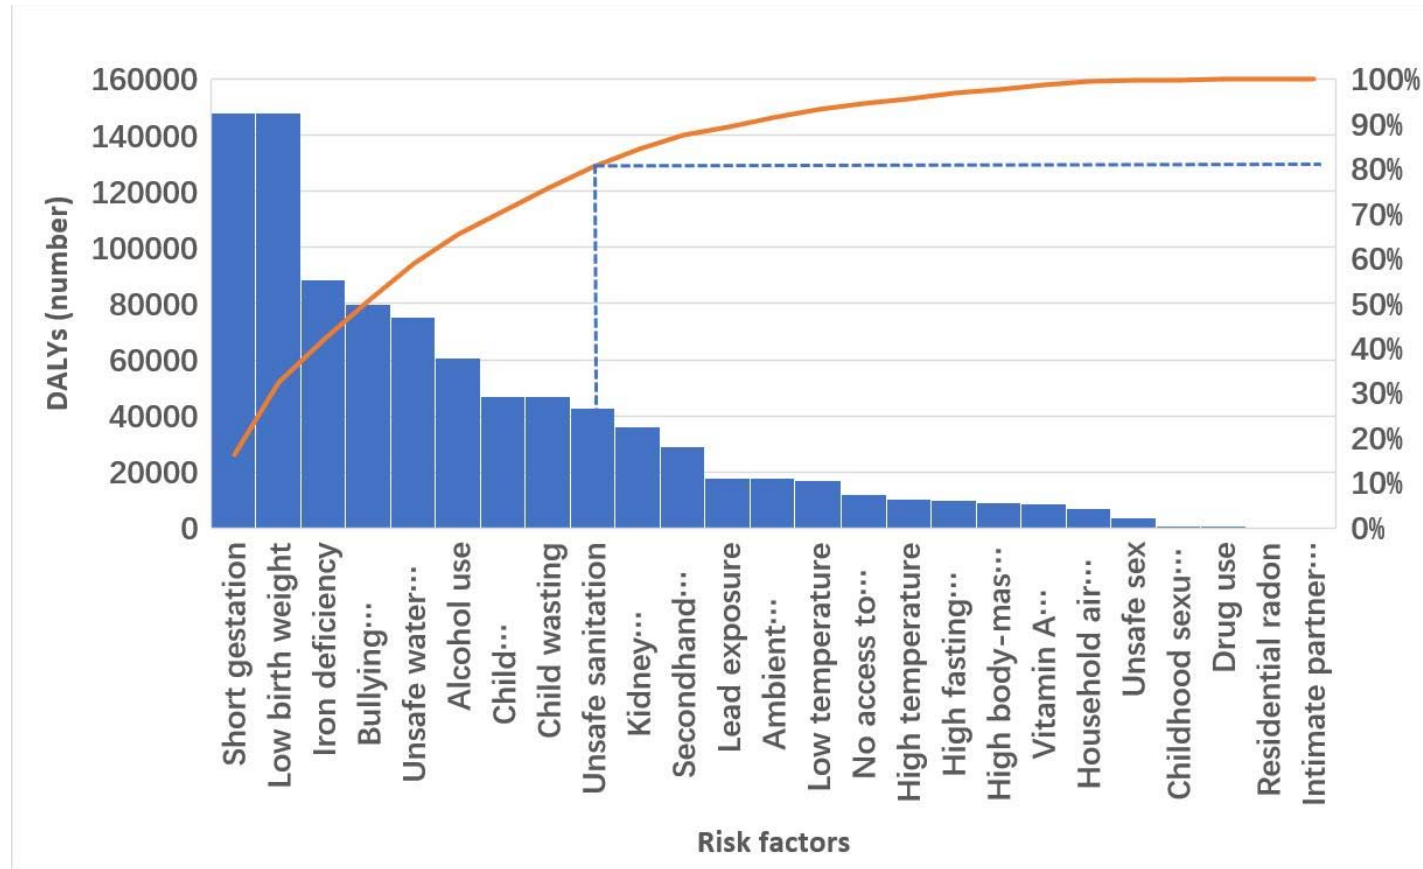

## 19 Legend of supplementary figures

### 19.1 Supplementary figure 1

Web interface of the Global Burden of Disease Collaborative Network.

### 19.2 Supplementary figure 2

Pareto analysis of main deaths causes of children aged < 5 years in 2019.

A: Neonatal disorders; B: Congenital birth defects; C: Unintentional injuries; D: Respiratory infections and tuberculosis; E: Neoplasms; F: Other infectious diseases; G: Transport injuries; H: HIV/AIDS and sexually transmitted infections; I: Digestive diseases; J: Cardiovascular diseases; K: Enteric infections; L: Neurological disorders; M: Nutritional deficiencies; N: Self-harm and interpersonal violence; O: Diabetes and kidney diseases; P: Chronic respiratory diseases; Q: Neglected tropical diseases and malaria; R: Skin and subcutaneous diseases; S: Substance use disorders

### 19.3 Supplementary figure 3

Pareto analysis of main DALYs causes of children aged <5 years in 2019. DALYs, disability-adjusted life-years.

A: Neonatal disorders; B: Congenital birth defects; C: Respiratory infections and tuberculosis; D: Unintentional injuries; E: Neoplasms; F: Other infectious diseases; G: Skin and subcutaneous diseases; H: Transport injuries; I: Enteric infections; J: Digestive diseases; K: HIV/AIDS and sexually transmitted infections; L: Nutritional deficiencies; M: Cardiovascular diseases; N: Neurological disorders; O: Chronic respiratory diseases; P: Mental disorders; Q: Sense organ diseases; R: Self-harm and interpersonal violence; S: Diabetes and kidney diseases; T: Neglected tropical diseases and malaria; U: Substance use disorders; V: Musculoskeletal disorders

#### 19.4 Supplementary figure 4

Pareto analysis of main deaths causes of children aged 5-14 years in 2019.

A: Unintentional injuries; B: Neoplasms; C: Transport injuries; D: Congenital birth defects; E: Respiratory infections and tuberculosis; F: Self-harm and interpersonal violence; G: Cardiovascular diseases; H: Other infectious diseases; I: Neurological disorders; J: Diabetes and kidney diseases; K: Digestive diseases; L: Enteric infections; M: HIV/AIDS and sexually transmitted infections; N: Chronic respiratory diseases; O: Musculoskeletal disorders; P: Neglected tropical diseases and malaria; Q: Nutritional deficiencies; R: Skin and subcutaneous diseases; T: Mental disorders; U: Neonatal disorders; V: Substance use disorders

#### 19.5 Supplementary figure 5

Pareto analysis of main DALYs causes of children aged 5-14 years in 2019. DALYs, disability-adjusted life-years.

A: Mental disorders; B: Unintentional injuries; C: Skin and subcutaneous diseases; D: Neoplasms; E: Transport injuries; F: Neurological disorders; G: Neonatal disorders; H: Congenital birth defects; I: Respiratory infections and tuberculosis; J: Chronic respiratory diseases; K: Musculoskeletal disorders; L: Sense organ diseases; M: Nutritional deficiencies; N: Cardiovascular diseases; O: Enteric infections; P: Self-harm and interpersonal violence; Q: Other infectious diseases; R: Digestive diseases; S: Neglected tropical diseases and malaria; T: Diabetes and kidney diseases; U: HIV/AIDS and sexually transmitted infections; V: Substance use disorders

#### 19.6 Supplementary figure 6

Pareto analysis of main risk factors of deaths for children aged < 5 years in 2019.

#### 19.7 Supplementary figure 7

Pareto analysis of main risk factors of DALYs for children aged < 5 years in 2019. DALYs, disability-adjusted life-years

### **19.8 Supplementary figure 8**

Pareto analysis of main risk factors of deaths for children aged 5-14 years in 2019.

### **19.9 Supplementary figure 9**

Pareto analysis of main risk factors of DALYs for children aged 5-14 years in 2019. DALYs, disability-adjusted life-years
